# Supplementary material for: Organic dry pea (Pisum sativum L.) biofortification for better human health
Source: PubMed Central journal article supplement (PMC8757916; doi:10.1371/journal.pone.0261109), 2022-01-13

# PLOS ONE

## Organic dry pea (*Pisum sativum* L.) biofortification for better human health

--Manuscript Draft--

|                                                                                      |                                                                                                                                                                                                                                                                                                                                                                                                                                                                                                                                                                                                                                                                                                                                                                                                                                                                                                                                                                                                                                                                                                                                                                                                                                                                                                                                                                                                                                                                                                                                                                                                                                                                                                                                                                                                                                                                                                                                                                                                                 |
|--------------------------------------------------------------------------------------|-----------------------------------------------------------------------------------------------------------------------------------------------------------------------------------------------------------------------------------------------------------------------------------------------------------------------------------------------------------------------------------------------------------------------------------------------------------------------------------------------------------------------------------------------------------------------------------------------------------------------------------------------------------------------------------------------------------------------------------------------------------------------------------------------------------------------------------------------------------------------------------------------------------------------------------------------------------------------------------------------------------------------------------------------------------------------------------------------------------------------------------------------------------------------------------------------------------------------------------------------------------------------------------------------------------------------------------------------------------------------------------------------------------------------------------------------------------------------------------------------------------------------------------------------------------------------------------------------------------------------------------------------------------------------------------------------------------------------------------------------------------------------------------------------------------------------------------------------------------------------------------------------------------------------------------------------------------------------------------------------------------------|
| <b>Manuscript Number:</b>                                                            | PONE-D-21-24900                                                                                                                                                                                                                                                                                                                                                                                                                                                                                                                                                                                                                                                                                                                                                                                                                                                                                                                                                                                                                                                                                                                                                                                                                                                                                                                                                                                                                                                                                                                                                                                                                                                                                                                                                                                                                                                                                                                                                                                                 |
| <b>Article Type:</b>                                                                 | Research Article                                                                                                                                                                                                                                                                                                                                                                                                                                                                                                                                                                                                                                                                                                                                                                                                                                                                                                                                                                                                                                                                                                                                                                                                                                                                                                                                                                                                                                                                                                                                                                                                                                                                                                                                                                                                                                                                                                                                                                                                |
| <b>Full Title:</b>                                                                   | Organic dry pea ( <i>Pisum sativum</i> L.) biofortification for better human health                                                                                                                                                                                                                                                                                                                                                                                                                                                                                                                                                                                                                                                                                                                                                                                                                                                                                                                                                                                                                                                                                                                                                                                                                                                                                                                                                                                                                                                                                                                                                                                                                                                                                                                                                                                                                                                                                                                             |
| <b>Short Title:</b>                                                                  | Organic dry pea biofortification                                                                                                                                                                                                                                                                                                                                                                                                                                                                                                                                                                                                                                                                                                                                                                                                                                                                                                                                                                                                                                                                                                                                                                                                                                                                                                                                                                                                                                                                                                                                                                                                                                                                                                                                                                                                                                                                                                                                                                                |
| <b>Corresponding Author:</b>                                                         | Dil Thavarajah<br>Clemson University<br>Clemson, SC UNITED STATES                                                                                                                                                                                                                                                                                                                                                                                                                                                                                                                                                                                                                                                                                                                                                                                                                                                                                                                                                                                                                                                                                                                                                                                                                                                                                                                                                                                                                                                                                                                                                                                                                                                                                                                                                                                                                                                                                                                                               |
| <b>Keywords:</b>                                                                     | Plant breeding, organic production, dry pea, biofortification, nutritional breeding, prebiotic carbohydrates, minerals                                                                                                                                                                                                                                                                                                                                                                                                                                                                                                                                                                                                                                                                                                                                                                                                                                                                                                                                                                                                                                                                                                                                                                                                                                                                                                                                                                                                                                                                                                                                                                                                                                                                                                                                                                                                                                                                                          |
| <b>Abstract:</b>                                                                     | <p>A primary criticism of organic agriculture is its lower yield and nutritional quality compared to conventional systems. Nutritionally, dry pea (<i>Pisum sativum</i> L.) is a rich source of low digestible carbohydrates, protein, and micronutrients. This study aimed to evaluate dry pea cultivars and advanced breeding lines using on-farm field selections to inform the development of biofortified organic cultivars with increased yield and nutritional quality. A total of 44 dry pea entries were grown in two USDA-certified organic on-farm locations in South Carolina (SC), USA, for two years. Seed yield and protein for dry pea ranged from 61 to 3833 kg/ha and 12.6 to 34.2 g/100 g, respectively, with low heritability estimates. Total prebiotic carbohydrate concentration ranged from 14.7 to 26.6 g/100 g. A 100-g serving of organic dry pea provides 73.5 to 133% of the recommended daily allowance (%RDA) of prebiotic carbohydrates. Heritability estimates for individual prebiotic carbohydrates ranged from 0.27 to 0.82. Organic dry peas are rich in minerals (Fe: 1.9-26.2 mg/100 g; Zn: 1.1-7.5 mg/100 g) and have low to moderate concentrations of phytic acid (18.8-516 mg/100 g). Significant cultivar, location, and year effects were evident for grain yield, thousand seed weight (TSW), and protein, but effects for other nutritional traits varied with genotype, environment, and interactions. "AAC Carver," "Jetset," and "Mystique" were the best-adapted cultivars with high yield, and "CDC Striker" had the highest protein concentration; these cultivars should be incorporated into organic dry pea breeding programs to develop cultivars suitable for organic production. In conclusion, organic dry pea has potential as a winter cash crop in southern climates but will require selecting diverse genetic material and location sourcing to develop improved cultivars with higher yield, disease resistance, and nutritional quality.</p> |
| <b>Order of Authors:</b>                                                             | Dil Thavarajah<br>Tristan J. Lawrence<br>Sarah Powers<br>Joshua Kay<br>Pushparajah Thavarajah<br>Emerson Shipe<br>Rebecca McGee<br>Shiv Kumar<br>Rick Boyles                                                                                                                                                                                                                                                                                                                                                                                                                                                                                                                                                                                                                                                                                                                                                                                                                                                                                                                                                                                                                                                                                                                                                                                                                                                                                                                                                                                                                                                                                                                                                                                                                                                                                                                                                                                                                                                    |
| <b>Additional Information:</b>                                                       |                                                                                                                                                                                                                                                                                                                                                                                                                                                                                                                                                                                                                                                                                                                                                                                                                                                                                                                                                                                                                                                                                                                                                                                                                                                                                                                                                                                                                                                                                                                                                                                                                                                                                                                                                                                                                                                                                                                                                                                                                 |
| <b>Question</b>                                                                      | <b>Response</b>                                                                                                                                                                                                                                                                                                                                                                                                                                                                                                                                                                                                                                                                                                                                                                                                                                                                                                                                                                                                                                                                                                                                                                                                                                                                                                                                                                                                                                                                                                                                                                                                                                                                                                                                                                                                                                                                                                                                                                                                 |
| <b>Financial Disclosure</b>                                                          | The funders had no role in study design, data collection and analysis, decision to publish, or preparation of the manuscript.                                                                                                                                                                                                                                                                                                                                                                                                                                                                                                                                                                                                                                                                                                                                                                                                                                                                                                                                                                                                                                                                                                                                                                                                                                                                                                                                                                                                                                                                                                                                                                                                                                                                                                                                                                                                                                                                                   |
| Enter a financial disclosure statement that describes the sources of funding for the |                                                                                                                                                                                                                                                                                                                                                                                                                                                                                                                                                                                                                                                                                                                                                                                                                                                                                                                                                                                                                                                                                                                                                                                                                                                                                                                                                                                                                                                                                                                                                                                                                                                                                                                                                                                                                                                                                                                                                                                                                 |

work included in this submission. Review the [submission guidelines](#) for detailed requirements. View published research articles from [PLOS ONE](#) for specific examples.

This statement is required for submission and **will appear in the published article** if the submission is accepted. Please make sure it is accurate.

#### Unfunded studies

Enter: *The author(s) received no specific funding for this work.*

#### Funded studies

Enter a statement with the following details:

- Initials of the authors who received each award
- Grant numbers awarded to each author
- The full name of each funder
- URL of each funder website
- Did the sponsors or funders play any role in the study design, data collection and analysis, decision to publish, or preparation of the manuscript?
- **NO** - Include this sentence at the end of your statement: *The funders had no role in study design, data collection and analysis, decision to publish, or preparation of the manuscript.*
- **YES** - Specify the role(s) played.

\* typeset

#### Competing Interests

Use the instructions below to enter a competing interest statement for this submission. On behalf of all authors, disclose any [competing interests](#) that could be perceived to bias this work—acknowledging all financial support and any other relevant financial or non-financial competing interests.

This statement is **required** for submission and **will appear in the published article** if the submission is accepted. Please make sure it is accurate and that any funding sources listed in your Funding Information

The authors have declared that no competing interests exist.

later in the submission form are also declared in your Financial Disclosure statement.

View published research articles from [PLOS ONE](#) for specific examples.

**NO authors have competing interests**

Enter: *The authors have declared that no competing interests exist.*

**Authors with competing interests**

Enter competing interest details beginning with this statement:

*I have read the journal's policy and the authors of this manuscript have the following competing interests: [insert competing interests here]*

\* typeset

**Ethics Statement**

Enter an ethics statement for this submission. This statement is required if the study involved:

- Human participants
- Human specimens or tissue
- Vertebrate animals or cephalopods
- Vertebrate embryos or tissues
- Field research

Write "N/A" if the submission does not require an ethics statement.

General guidance is provided below. Consult the [submission guidelines](#) for detailed instructions. **Make sure that all information entered here is included in the Methods section of the manuscript.**

"N/A" if the submission does not require an ethics statement

**Format for specific study types**

**Human Subject Research (involving human participants and/or tissue)**

- Give the name of the institutional review board or ethics committee that approved the study
- Include the approval number and/or a statement indicating approval of this research
- Indicate the form of consent obtained (written/oral) or the reason that consent was not obtained (e.g. the data were analyzed anonymously)

**Animal Research (involving vertebrate animals, embryos or tissues)**

- Provide the name of the Institutional Animal Care and Use Committee (IACUC) or other relevant ethics board that reviewed the study protocol, and indicate whether they approved this research or granted a formal waiver of ethical approval
- Include an approval number if one was obtained
- If the study involved *non-human primates*, add *additional details* about animal welfare and steps taken to ameliorate suffering
- If anesthesia, euthanasia, or any kind of animal sacrifice is part of the study, include briefly which substances and/or methods were applied

**Field Research**

Include the following details if this study involves the collection of plant, animal, or other materials from a natural setting:

- Field permit number
- Name of the institution or relevant body that granted permission

**Data Availability**

Authors are required to make all data underlying the findings described fully available, without restriction, and from the time of publication. PLOS allows rare exceptions to address legal and ethical concerns. See the [PLOS Data Policy](#) and [FAQ](#) for detailed information.

Yes - all data are fully available without restriction

A Data Availability Statement describing where the data can be found is required at submission. Your answers to this question constitute the Data Availability Statement and **will be published in the article**, if accepted.

**Important:** Stating 'data available on request from the author' is not sufficient. If your data are only available upon request, select 'No' for the first question and explain your exceptional situation in the text box.

Do the authors confirm that all data underlying the findings described in their manuscript are fully available without restriction?

**Describe where the data may be found in full sentences. If you are copying our sample text, replace any instances of XXX with the appropriate details.**

- If the data are **held or will be held in a public repository**, include URLs, accession numbers or DOIs. If this information will only be available after acceptance, indicate this by ticking the box below. For example: *All XXX files are available from the XXX database (accession number(s) XXX, XXX).*
- If the data are all contained **within the manuscript and/or Supporting Information files**, enter the following:  
*All relevant data are within the manuscript and its Supporting Information files.*
- If neither of these applies but you are able to provide **details of access elsewhere**, with or without limitations, please do so. For example:

*Data cannot be shared publicly because of [XXX]. Data are available from the XXX Institutional Data Access / Ethics Committee (contact via XXX) for researchers who meet the criteria for access to confidential data.*

*The data underlying the results presented in the study are available from (include the name of the third party*

All relevant data are within the manuscript and its Supporting Information files.

|                                                                                                                                                                                                                                         |                                                                                                                                     |
|-----------------------------------------------------------------------------------------------------------------------------------------------------------------------------------------------------------------------------------------|-------------------------------------------------------------------------------------------------------------------------------------|
| <p><i>and contact information or URL).</i></p> <ul style="list-style-type: none"><li>• This text is appropriate if the data are owned by a third party and authors do not have permission to share the data.</li></ul> <p>* typeset</p> |                                                                                                                                     |
| Additional data availability information:                                                                                                                                                                                               | Tick here if your circumstances are not covered by the questions above and you need the journal's help to make your data available. |

1 Running title: Organic dry pea biofortification

2

3

4 **Organic dry pea (*Pisum sativum* L.) biofortification for better human health**

5

6 Dil Thavarajah<sup>1</sup>, Tristan J. Lawrence<sup>1</sup>, Sarah E. Powers<sup>1</sup>, Joshua Kay<sup>1</sup>, Pushparajah Thavarajah<sup>1</sup>,  
7 Emerson Shipe<sup>1</sup>, Rebecca McGee<sup>2</sup>, Shiv Kumar<sup>3</sup>, Rick Boyles<sup>3</sup>

8

9 <sup>1</sup>Plant and Environmental Sciences, 113 Biosystems Research Complex, Clemson University,  
10 Clemson, SC 29634, USA.

11 <sup>2</sup>USDA Agriculture Research Service, Grain Legume Genetics and Physiology Research Unit,  
12 Washington State University, Pullman, WA 99164, USA.

13 <sup>3</sup>Biodiversity and Crop Improvement Program, International Centre for Agricultural Research in  
14 the Dry Areas (ICARDA), P.O. Box 6299, Rabat-Institute, Rabat, Morocco.

15 <sup>4</sup>Plant and Environmental Sciences, 210 Pitner Center, PeeDee Research and Education Center,  
16 2200 Pocket Road, Florence, SC 29506, USA.

17

18 Author for correspondence: Dil Thavarajah, Tel: +18646562607, Email: [dthavar@clemson.edu](mailto:dthavar@clemson.edu)

19

20

21

22

23

24

25

26 **Abstract:** A primary criticism of organic agriculture is its lower yield and nutritional quality  
27 compared to conventional systems. Nutritionally, dry pea (*Pisum sativum* L.) is a rich source of  
28 low digestible carbohydrates, protein, and micronutrients. This study aimed to evaluate dry pea  
29 cultivars and advanced breeding lines using on-farm field selections to inform the development of  
30 biofortified organic cultivars with increased yield and nutritional quality. A total of 44 dry pea  
31 entries were grown in two USDA-certified organic on-farm locations in South Carolina (SC),  
32 USA, for two years. Seed yield and protein for dry pea ranged from 61 to 3833 kg/ha and 12.6 to  
33 34.2 g/100 g, respectively, with low heritability estimates. Total prebiotic carbohydrate  
34 concentration ranged from 14.7 to 26.6 g/100 g. A 100-g serving of organic dry pea provides 73.5  
35 to 133% of the recommended daily allowance (%RDA) of prebiotic carbohydrates. Heritability  
36 estimates for individual prebiotic carbohydrates ranged from 0.27 to 0.82. **Organic dry peas are**  
37 **rich in minerals (Fe: 1.9-26.2 mg/100 g; Zn: 1.1-7.5 mg/100 g) and have low to moderate**  
38 **concentrations of phytic acid (18.8-516 mg/100 g).** Significant cultivar, location, and year effects  
39 were evident for grain yield, thousand seed weight (TSW), and protein, but effects for other  
40 nutritional traits varied with genotype, environment, and interactions. “AAC Carver,” “Jetset,” and  
41 “Mystique” were the best-adapted cultivars with high yield, and “CDC Striker” had the highest  
42 protein concentration; these cultivars should be incorporated into organic dry pea breeding  
43 programs to develop cultivars suitable for organic production. In conclusion, organic dry pea has  
44 potential as a winter cash crop in southern climates but will require selecting diverse genetic  
45 material and location sourcing to develop improved cultivars with higher yield, disease resistance,  
46 and nutritional quality.

47 **Keywords:** Plant breeding, organic production, dry pea, biofortification, nutritional breeding,  
48 prebiotic carbohydrates, minerals

49

50

51

52

53



54 **Introduction:** Organic agriculture production has increased since the American Organic Foods  
55 Production Act of 1990. The USDA National Organic Standards Board describes organic  
56 agriculture as “*an ecological production management system that promotes and enhances*  
57 *biodiversity, biological cycles, and soil biological activity*” (USDA, 2016). Pulse crops, including  
58 dry pea (*Pisum sativum* L.), increase the ecological, economic, and social benefits of organic  
59 cropping systems via biological nitrogen (N) fixation, enhanced biodiversity, and creation of  
60 healthy food systems that can combat malnutrition and obesity. Organic agriculture is perceived  
61 as more environmentally friendly and sustainable than high-yielding conventional farming  
62 systems. Several studies support that notion, indicating organic farming systems provide a range  
63 of soil, biological, ecological, and other environmental benefits over conventional farming systems  
64 (Murphy *et al.*, 2007; Crowder and Reginold, 2015).

65 Dry pea is an excellent source of complex carbohydrates, protein, vitamins, and minerals  
66 (5,6). Dry peas are naturally rich in iron (Fe: 4.6-5.4 mg/100 g), zinc (Zn: 3.9-6.3 mg/100 g), and  
67 magnesium (Mg: 135-143 mg/100 g). In addition, dry pea is naturally low in phytic acid (PA) (4.9-  
68 7.1 mg/g of PA or 1.4-2 mg/g of phytic-P) despite very high total P concentrations (3.5-5 mg/g)  
69 (Amarakoon *et al.*, 2012, 2015; Ray *et al.*, 2014; Powers and Thavarajah, 2019; Powers *et al.*,  
70 2020). Nutritionally, dry pea is a rich source of low digestible carbohydrates (12-15 g/100 g),  
71 protein (20-25 g/100 g), and essential amino acids (e.g., lysine and tryptophan) (Powers and  
72 Thavarajah, 2019; Powers *et al.*, 2020). Dry pea, in a symbiotic relationship with *Rhizobium*  
73 bacteria, can also fix atmospheric nitrogen, providing 75-120 kg of N per hectare for use by  
74 subsequent crops (Peoples *et al.*, 1995).

75 Consumer demand for pulses has increased due to the demand for plant-based protein (Ohr,  
76 2020). However, organic farming systems face three significant global challenges: (1) maintaining  
77 crop productivity to produce enough food for a projected population of 9 billion in 2050, (2)  
78 delivering the expected nutritional quality as a human food and animal feed, and (3) maintaining  
79 ecological benefits, e.g., N and phosphorus (P) use efficiency (13). A primary criticism of organic  
80 agriculture is lower yield and nutritional quality compared to non-organic systems. Organic grains  
81 use soil nutrients derived from organic cover crop breakdown. Organic consumers believe organic  
82 foods are nutritionally superior and improve human health compared to conventional foods;  
83 however, organically grown grains typically have lower yields and nutritional quality than  
84 conventionally grown crops (Trewavas, 2001; Murphy *et al.*, 2007; Wiebe *et al.*, 2016). A meta-

85 analysis of over 10,000 organic farmers representing >800,000 hectares of organic farmland  
86 demonstrated that, averaged among food crops (wheat, maize, common bean, potato, and  
87 vegetables), the organic yield was 80% of conventional yield (Kniss *et al.*, 2016). The organic to  
88 conventional yield ratio varied with crop type, cultivars in production, and growing locations,  
89 highlighting the importance of regional breeding programs for organic production (Kniss *et al.*,  
90 2016). Therefore, it is essential within the organic farming framework to focus on organic plant  
91 breeding, resulting in more suitable cultivars for organic production and delivering enhanced  
92 nutritional quality and nutrient bioavailability to combat micronutrient malnutrition, obesity, and  
93 overweight.

94 Current world pea production is 14.1 MMT on over 18 million acres, with US dry pea  
95 production representing about 7.1% of world production on 1,052,001 acres (FAO, 2020). The  
96 USDA does not report definite statistics on organic dry pea acreage. Still, the number of acres  
97 devoted to organic pulse crops is approximately 1.5-2% of total dry pea and lentil acreage. In 2011,  
98 certified organic dry peas and lentils were grown on more than 17,877 acres; North Dakota and  
99 Washington led with over 3,500 acres each (19). Yellow dry pea has become one of the popular  
100 cool-season legumes grown in SC during the winter. Carolina soils, especially in the Pee Dee  
101 region, have pH and soil phosphorus (P), potassium (K), and organic matter levels appropriate for  
102 dry pea germination, establishment, and growth. A rotational cropping system of dry pea and cereal  
103 has shown promise in sustainable, non-organic farming operations (20). Winter legumes provide  
104 weed control and available soil N and P for the following summer grain crop (Powers and  
105 Thavarajah, 2019). Developing crops for optimal performance in organic management systems  
106 requires integrating a range of traits, such as yield, agronomy, nutrient use efficiency, disease  
107 resistance, and nutritional quality. However, no breeding efforts have aimed to reduce the yield  
108 gap or increase the nutritional quality (i.e., biofortification) of dry pea for organic farming systems.  
109 Similarly, genomic and translational resources for selecting dry pea cultivars for organic  
110 production are also nonexistent.

111 With increasing societal nutritional needs for organically grown dry pea, biofortification  
112 brings organic plant breeding and nutritional sciences together to work on the persistent problems  
113 of human nutrition. In addition, biofortification of dry pea under organic systems will improve  
114 human nutrition, provide N and C benefits to subsequent cereal and vegetable crops, and increase  
115 nutrient use efficiency and biodiversity. Current organic pulse production depends on cultivars

116 that have been bred for non-organic production, but these are often not suited to organic  
117 production. For example, these cultivars may have a low grain yield, production issues (weed  
118 control, disease resistance, etc.), and low nutritional quality. The objectives of this study were to  
119 evaluate 44 dry pea entries in two on-farm locations for two years to determine grain yield and  
120 nutritional quality for human food, e.g., high protein, low digestible carbohydrates, and minerals  
121 as well as low phytate.

## 122 **Materials and Methods**

123 **Materials:** Standards, chemicals, and high-purity solvents used for prebiotic carbohydrate,  
124 minerals, and PA analysis were purchased from Sigma Aldrich Co. (St. Louis, MO), Fisher  
125 Scientific (Waltham, MA), VWR International (Radnor, PA), and Tokyo Chemical Industry  
126 (Portland, OR) and used without further purification. Water, distilled, and deionized (ddH<sub>2</sub>O) to a  
127 resistance of  $\geq 18.2$  M $\Omega$ ×cm (PURELAB flex 2 system, ELGA LabWater North America,  
128 Woodridge, IL) was used for sample and reagent preparation.

129 **Field design:** The experimental field design was a randomized complete block design (RCDB)  
130 with 44 dry pea entries (25 cultivars and 19 advanced breeding lines) with two replications at two  
131 locations in 2019 and three replications at one location in 2020 (n=308; **Table 1**). The commercial  
132 dry pea cultivars were purchased from Pulse USA (Bismark, ND, USA), Meridian Seeds  
133 (Mapleton, ND, USA), and the Washington State Crop Improvement Association (Pullman, WA,  
134 USA). The advanced dry pea breeding accessions were obtained from the USDA-ARS Pulse  
135 Breeding Program, Washington State University, WA, USA (**Table 1**). Material transfer  
136 agreements (MTAs) were signed with the seed companies and the USDA-ARS for field testing  
137 these entries in SC, USA. These dry pea cultivars were selected based on yield potential, disease  
138 resistance, and consumer acceptability. Before sowing, two soil samples were randomly taken at  
139 0-6" depth from each plot. The soil samples were homogenized, and three composite samples were  
140 analyzed for soil properties at the Clemson University Soil Testing laboratory, SC, USA. Soil  
141 properties, precipitation, and temperature varied with growing location (**Tables 2 and 3**).

142 **Land preparation:** USDA-certified organic on-farm locations were WP Rawl and Sons (Pelion,  
143 SC, USA) and Calhoun Fields Laboratory (Clemson University, SC, USA). Before planting, fields  
144 were tilled using a disc harrow and smoothly leveled. All plots were then marked with a  
145 weatherproof barcoded field tag, and cultivar "Hampton" was planted as a control to eliminate the  
146 border effect. A cone plot planter was used for sowing seed in 1.4×6 m plots (8.4 m<sup>2</sup>) containing

147 seven rows spaced 20 cm (7.9 in) apart, with a seeding depth of 5-7 cm (~2-3 in), at a seeding rate  
148 of 90 seeds/m<sup>2</sup>. USDA-certified organic inoculant (Peaceful Valley Farm Supply, Inc, USA) was  
149 added to the seed packets at the rate of 3.1 g per kg of seed. Organically certified fertilizers,  
150 pesticides, and chemicals were not used in this experiment; weeds were removed by a mechanical  
151 cultivator attached to a small tractor. Irrigation was not provided. These cultivars and breeding  
152 lines were planted in mid-January and harvested in the third week of May. At physiological  
153 maturity (110-115 days after planting), the plots were harvested using a small plot. Dry pea grain  
154 yield was calculated based on the size of the plot, and 1000-seed weight (TSW) was calculated  
155 from the weight of 100 seeds, measured using a top-loading electronic balance. Subsamples (500-  
156 750 g) of harvested seeds were stored at -10 °C until nutritional quality analysis. Additional dry  
157 pea samples collected from each replication were hand cleaned, finely ground using a UDY  
158 grinder, and then stored at -10 °C until nutritional quality analysis. All nutritional quality data are  
159 reported on a dry basis (15% moisture).

160 **Protein analysis:** Finely ground dry pea samples were sent to the Soil Testing Laboratory,  
161 Clemson University, SC, for total N analysis, and then values converted to total protein content by  
162 multiplying by 6.25.

163 **Prebiotic carbohydrate analysis:** Dry pea seeds were ground (Blade Coffee Grinder, KitchenAid,  
164 St. Joseph, MI, USA) and sieved to 0.5-mm particle size. Carbohydrates were extracted the method  
165 described by Muir *et al.*, 2009. Ground dry pea samples (150 mg) were weighed into a centrifugal  
166 polypropylene tube (VWR International, Radnor, PA, USA). After adding 10 mL of water, each  
167 tube was mixed on a vortex mixer and placed in a water bath for 1 h at 80 °C. Tubes were then  
168 centrifuged at 3000 g for 10 min, and the supernatant was filtered through a 13 mm × 0.45 µm  
169 nylon syringe filter (Thermo Fisher Scientific, MA, USA) into an HPLC vial. Carbohydrate  
170 analysis was done using a Dionex ICS-5000+ system (Thermo Scientific, Waltham, MA, USA)  
171 equipped with a pulsed amperometric detector (PAD) with a working gold electrode and a silver-  
172 silver chloride reference electrode. Analyte separation was achieved using a Dionex CarboPac  
173 PA1 analytical column (250 × 4 mm) in series with a Dionex CarboPac PA1 guard column (50 ×  
174 4 mm). Pure standards were used to identify peaks, generate calibration curves, and monitor  
175 detector sensitivity; a lab reference sample was also used to monitor extraction consistency.  
176 Concentrations were quantified within a linear range of 0.1-500 ppm with a minimum detection  
177 limit of 0.1 ppm. Concentrations of each carbohydrate were calculated according to  $X = (C \times V) /$

178 m, where X is the moisture-corrected analyte concentration in the sample, C is the concentration  
179 in the filtrate, V is the sample volume, and m is the mass of the sample.

180 **Starch analysis:** Resistant, non-resistant, and total starch were measured using the **modified**  
181 **Megazyme resistant** starch assay method (22). Samples (100 mg) of finely ground seed were  
182 weighed into centrifugal polypropylene tubes, to which an enzyme solution (2 mL) containing  
183 amyloglucosidase (3 U/mL) and  $\alpha$ -amylase (10 mg/mL) in sodium maleate buffer (100 mM, pH  
184 6.0) was added. Tubes were then incubated with constant circular shaking (200 strokes/min) for  
185 16 h at 37 °C. Ethanol (4 mL; 99%) was added, then the tubes were vortexed, centrifuged at 1500  
186 g for 10 min, and decanted into 100-mL volumetric flasks. Two additional washings were  
187 performed by adding 2 mL of ethanol (50%) and vortex mixing to suspend the pellet, followed by  
188 an additional 6 mL of ethanol (50%), vortex mixing, centrifugation, and decanting. Pooled non-  
189 resistant starch washings were brought to 100 mL volume with water. Pellets containing resistant  
190 starch were dissolved in 2 mL of 2 M KOH with a magnetic stir bar for 20 min in an ice water  
191 bath. Sodium acetate buffer (8 mL, 1.2 M, pH 3.8) was added, immediately followed by 0.1 mL  
192 of amyloglucosidase (AMG; 3300 U/mL). Samples were incubated at 50 °C in a water bath for 30  
193 min. Tubes were then centrifuged (1500 g for 10 min). Resistant starch (RS) and non-resistant  
194 starch fractions were quantified via spectrophotometry. Starch solution (0.1 mL) and glucose  
195 oxidase/oxidase (GOPOD) reagent (3 mL) were added to glass tubes and incubated for 20 min  
196 at 50 °C. A glucose standard (1 mg/mL in 0.2% benzoic acid) was included in each batch.  
197 Absorbance was measured at 510 nm against a reagent blank. Non-resistant starch (NRS) was  
198 calculated using the formula  $NRS (g/100 g \text{ sample}) = \Delta E \times F/W \times 90$ , where  $\Delta E$  is the absorbance  
199 of the sample, F is the absorbance to microgram conversion factor (100 / absorbance of glucose  
200 standard), W is the sample dry weight, and 90 includes adjustments for volume, unit conversions,  
201 and free to anhydrous glucose. A similar formula was used to calculate resistant starch (RS),  $RS$   
202  $(g/100 g \text{ sample}) = \Delta E \times F/W \times 9.27$ , where 9.27 includes adjustments for volume, unit  
203 conversions, and free to anhydrous glucose. Total starch (TS) was calculated as  $TS = RS + NRS$ .

204 **Statistical analysis:** Replicates, years and genotypes were included as class variables. **Data from**  
205 **both years were combined (after testing for heterogeneity)** and analyzed using a general linear  
206 model procedure (PROC GLM) mixed model (SAS Institute 9.4, 2012). Fisher's least significant  
207 difference (LSD) at  $\leq 0.05$  was performed for mean separation. Correlations (Pearson correlation  
208 coefficients) among yield, TSW, and other traits were determined. ANOVA was used to determine

209 if the effect was significant. A statistical model was developed to estimate broad-sense heritability  
210 ( $H^2$ ) with the variables and genotype as random effects. The model was calculated using the  
211 restricted maximum likelihood (REML) method.  $H^2$  was estimated as the proportion of variance  
212 due to genotype, and analyses were performed using JMP 14.0.0 and SAS 9.4.

## 213 **Results**

214 **Field weather and soil conditions:** The field trials took place at Clemson and Pelion, SC during  
215 2019 and at Pelion, SC in 2020. A total of 25 cultivars and 19 breeding lines were evaluated at  
216 each location, with two replicates in 2019 due to seed limitations and three replicates in 2020 ( $n =$   
217 308) (**Table 1**). In 2019, the Pelion, SC location was warmer (25.6 °C) and received more  
218 precipitation (68.6 mm) in May than the Clemson, SC location. In 2020, the average temperature  
219 was lower (20.8 °C) and the average precipitation was higher (236 mm) at Pelion, SC than in the  
220 previous year (**Table 2**). In 2019, the Clemson field had a lower pH (6.3), with higher N-NO<sub>3</sub> (48  
221 ppm), K (284 lbs/ac), and organic matter (4.3%) than the Pelion field, which had more P (727  
222 lbs/ac). In 2020, Pelion soil values reflected higher pH (6.8 to 7.1), N-NO<sub>3</sub> (16 to 21 ppm), and  
223 organic matter (0.8 to 1.1%) compared to 2019 as well as lower levels of P (727 to 549 lbs/ac) and  
224 K (108 to 81 lbs/ac) (**Table 3**). Clemson soils are clay loam, and Pelion soils are sandy, which  
225 may explain the differences in N, K, and organic matter.

226 **Analysis of variance:** With respect to yield, cultivar, year, and cultivar × location were highly  
227 significant at  $P < 0.05$ , location and cultivar × year were significant at  $P < 0.1$ , and all components  
228 were highly significant ( $P < 0.05$ ) for TSW (**Table 4**). Only cultivar × location was not significant  
229 for protein, with all other components highly significant ( $P < 0.05$ ) (**Table 4**). Broad-sense  
230 heritability estimates indicated TSW was more heritable ( $H^2 = 0.69$ ) than yield ( $H^2 = 0.21$ ) and  
231 protein ( $H^2 = 0.24$ ). Most prebiotic carbohydrates varied with dry pea cultivar except for maltose  
232 and starch polysaccharides. For sugar alcohols, location was not significant for xylitol and  
233 mannitol, year was not significant for sorbitol, cultivar × location was not significant for mannitol,  
234 and cultivar × year was not significant for sorbitol; all other components were significant ( $P < 0.05$ )  
235 for each sugar alcohol (**Table 4**). For simple sugars, only cultivar and location significantly  
236 ( $P < 0.05$ ) affected glucose concentration, and only location and year were significant ( $P < 0.05$ ) for  
237 maltose concentration. Cultivar × location was not significant for fructose concentration, and  
238 cultivar × year was not significant for sucrose concentration. Location was not significant for  
239 arabinose concentration, with all other components being highly significant ( $P < 0.05$ ) for simple

240 sugars. For RFO and FOS, location was not significant for Ver+Kes, and cultivar × location was  
241 not significant for nystose, with all other components significant ( $P < 0.1$  and  $P < 0.05$ ) for each RFO  
242 and FOS (**Table 4**). Location ( $P < 0.05$ ), year ( $P < 0.1$ ), and cultivar × year ( $P < 0.05$ ) had significant  
243 effects on resistant starch, while only location and year were significant ( $P < 0.05$ ) for total starch.  
244 Prebiotic carbohydrates exhibited broad ranges of heritability for organic dry pea, with glucose  
245 and fructose having the lowest heritability at 0.29 and 0.27, respectively. Galactinol ( $H^2 = 0.74$ ) and  
246 Ver+Kes ( $H^2 = 0.75$ ) had the highest heritability, with all other prebiotic carbohydrates having  
247 moderate to high heritability, except for maltose and the starch polysaccharides, which were not  
248 heritable. For mineral concentrations, cultivar was significant for all minerals except Se; cultivar  
249 × location was only significant for K ( $P < 0.1$ ) and Fe ( $P < 0.05$ ), and cultivar × year was not  
250 significant for any mineral (**Table 4**). Location was significant ( $P < 0.05$ ) for K, Ca, Mg, Fe, Zn,  
251 and Se but not for P, Mn, and Cu. Additionally, the year was significant ( $P < 0.05$ ) for K, Ca, Fe,  
252 Zn, and Se but not for Mg, P, Mn, and Cu. Finally, only cultivar ( $P < 0.1$ ) and year ( $P < 0.05$ ) were  
253 significant for PA concentration of organically grown dry pea (**Table 4**). All minerals were found  
254 to be not heritable.

255 **Nutritional quality:** Organic dry pea shows broad phenotypic variation for protein (12.6-34.2  
256 g/100 g), prebiotic carbohydrates (12.5-19.8 g/100 g), minerals, and PA (88.8-354 mg/100 g)  
257 (**Table 5**). Organic dry pea can provide a significant portion of the recommended daily allowance  
258 (RDA) of prebiotic carbohydrates (81%), protein (38-46%), and a range of minerals (**Table 5**).  
259 Organic dry pea provides a significant amount of the %RDA for K (29.6-38.8%), Mg (31.3-  
260 40.3%), Zn (29.1-40%), and Se (36.4%) for both men and women but is not a good source of Ca  
261 (7.8-9.4%) in the diet (**Table 5**).

262 **Cultivar responses:** Yield varied among the organically grown cultivars, with “AAC Carver”  
263 having the highest yield (~2600 kg/ha) and “LG Koda” the lowest (~750 kg/ha) (**Figure 2**). “AAC  
264 Carver” had one of the lowest protein concentrations (~19 g/100g), while “CDC Striker,” which  
265 had one of the lowest yields (~1000 kg/ha), had the highest protein concentration (~24 g/100 g)  
266 (**Figure 2**). Cultivars varied in terms of the total concentrations of the sugar alcohols myo-inositol,  
267 xylitol, galactitol, sorbitol, and mannitol (**Figure 3A**). The cultivar “Hampton” had the lowest  
268 concentration of sugar alcohols (~425 mg/100 g) and “CDC Greenwater” the highest (575 mg/100  
269 g) (**Figure 3A**). All cultivars had varying concentrations of RFOs (Raf+Sta and Ver+Kes), with

270 cultivar “Fiddle” having the lowest total RFO concentration (~5200 mg/100 g) and cultivar  
271 “Mystique” the highest (~6000 mg/100 g) (**Figure 3B**).

272 Analysis using Pearson’s correlation was performed to determine significant correlations  
273 between agronomic and nutritional quality traits (**Figure 1**). A significant ( $P<0.05$ ) and strong  
274 correlation was observed for total water-soluble carbohydrates and yield ( $r=0.42$ ), with low but  
275 significant ( $P<0.05$ ) positive correlations found between TSW and yield ( $r=0.2$ ), and TSW and  
276 total water-soluble carbohydrates ( $r=0.26$ ) (**Figure 1**). Protein was significantly ( $P<0.05$ )  
277 negatively correlated with all agronomic traits: yield ( $r=-0.2$ ), TSW ( $r=-0.26$ ), and total water-  
278 soluble carbohydrates ( $r=-0.1$ ) (**Figure 1**). More specifically, significant ( $P<0.05$ ) negative  
279 correlations were found between yield and xylitol, mannitol, sucrose, arabinose, maltose, and  
280 resistant starch, but the yield was significantly ( $P<0.05$ ) positively correlated with galactinol,  
281 sorbitol, glucose, fructose ( $P<0.1$ ), all RFO and FOS, as well as soluble starch and total starch  
282 (**Table 6**). Finally, yield was not correlated with Zn, P, or PA but was positively correlated with  
283 both Mg ( $P<0.05$ ) and Fe ( $P<0.1$ ). A significant ( $P<0.1$ ) negative correlation was observed  
284 between yield and K (**Table 7**). Positive, significant correlations were evident for protein and myo-  
285 inositol ( $P<0.1$ ), xylitol ( $P<0.1$ ), mannitol ( $P<0.05$ ), sucrose ( $P<0.1$ ), arabinose ( $P<0.05$ ), and  
286 maltose ( $P<0.05$ ). Protein was predominantly negatively correlated with RFO and FOS  
287 carbohydrates ( $P<0.05$ ) (**Table 6**). All minerals were significantly ( $P<0.05$ ) positively correlated  
288 with each other, while PA was negatively correlated with all minerals, especially Zn ( $P<0.05$ )  
289 (**Table 7**).

290 **Discussion:** Organic pulse crop production is challenging for many reasons, one being the less  
291 suitable cultivars adapted for low-input organic systems. Current dry pea cultivars in North  
292 America are mainly bred for conventional production systems that use chemical herbicides and  
293 pesticides for weed, pest, and disease management. This paper reports the first detailed field study  
294 conducted in USDA Organic Certified fields to assess the performance of dry pea cultivars and  
295 advanced breeding lines under organic field conditions without adding any chemical fertilizers or  
296 herbicides. Our study clearly indicates “AAC Carver,” “Jetset,” and “Mystique” are the highest  
297 yielding dry pea cultivars (above 2000 kg/ha) and are the most suitable for organic production  
298 without a yield penalty (**Figure 1**). The average crude protein content of the cultivars studied is  
299 ~21.1 g/100 g, with “CDC Striker” being the highest and “AAC Carver” the lowest (**Figure 1**).  
300 Our on-farm organic field trials provide a thorough evaluation of available dry pea cultivars for



301 yield, protein, and other nutritional traits for two years. The information from this study will help  
302 organic producers decide if these dry pea cultivars will be profitable on their farm and, if so, which  
303 cultivar will perform best in their organic cropping system in terms of yield and protein. In  
304 addition, these data are very useful for future organic dry pea cultivar development with respect to  
305 selecting appropriate parents for organic systems.

306 Weed management in organic systems is a significant challenge. Dry pea is not a good  
307 weed competitor. Yield losses in organic systems can be up to 80% due to post-emergent weeds  
308 in the Northern Great Plains of Canada (Leeson *et al.*, 2000; Baird *et al.*, 2009; Shirtliffe and  
309 Johnson, 2012). Suggested methods to reduce weed pressure in an organic cropping system are to  
310 increase seeding rate, crop rotation, and seeding depth and to change planting dates. In Canada,  
311 dry pea reached a maximum economic return at a seeding rate of 200 seed/m<sup>2</sup> with a grain yield  
312 of 1725 kg ha<sup>-1</sup> (Baird *et al.*, 2009). We used dry pea as a winter crop (Jan-May) in SC with 90  
313 seeds/m<sup>2</sup> and manually reduced the post-emergence weeds, and several dry pea cultivars tested (7  
314 out of 25) reached more than the threshold yields reported by the Canadian study (**Figure 1**).  
315 Additionally, organic dry pea grain yields in the present study significantly varied with cultivar,  
316 year, and the interaction of cultivar × location (P<0.05), indicating cultivar performance is subject  
317 to growing conditions, e.g., soil, weather, and organic management conditions. Overall, average  
318 dry pea grain yield (769-2638 kg ha<sup>-1</sup>) and protein concentrations (19.3- 24.2 mg/100 g) from this  
319 study are similar to results reported for studies in Canada and Australia (Baird *et al.*, 2009; Gollner  
320 *et al.*, 2019).

321 Pulse crops show great potential for biofortification and are suitable for meeting increasing  
322 consumer demand for organic plant-based protein, prebiotic carbohydrates, and minerals,  
323 especially within allergen- and gluten-free markets (Ray *et al.*, 2014; Johnson *et al.*, 2013;  
324 Thavarajah *et al.*, 2017). Our results indicate organic dry peas are rich in prebiotic carbohydrates  
325 (12.5-19.8 g/100 g), providing 63-99% of the RDA for adults (**Table 5**). Sugar alcohols and RFOs  
326 have moderate to high broad-sense heritability (0.42-0.75) estimates, indicating it is possible to  
327 breed for variable concentrations of these prebiotic carbohydrates for better human health. Sucrose  
328 and arabinose are heritable traits, but starch polysaccharides are not (**Table 4**). Total water-soluble  
329 carbohydrates (carbohydrates without starch polysaccharides) are significantly and positively  
330 correlated with grain yield and TSW but negatively correlated with seed protein content (**Figure**  
331 **2**). Organic dry pea prebiotic carbohydrate concentrations reported in this study are similar the

332 values reported in the literature (Wang *et al.*, 2009, 2011; Johnson *et al.*, 2013, 2015; Vandemark  
333 *et al.*, 2020). Prebiotic carbohydrates are critical components in healthy diets, supporting healthful  
334 hindgut microflora. Healthy gut microbiota decrease host obesity, inflammatory bowel diseases,  
335 and colorectal cancers and modulate immunological functions by affecting the growth and  
336 functioning of host cells (Ley *et al.*, 2005). Due to the dietary nature of human metabolic disorders  
337 related to obesity, solutions will necessarily have a focus on a diet – *i.e.*, a cup of pulses a day  
338 provides 13-15 g of prebiotic carbohydrates and a range of micronutrients (Amarakoon *et al.*,  
339 2012; Powers and Thavarajah, 2019; Powers *et al.*, 2020). Changing the levels of these prebiotic  
340 carbohydrates is possible by developing molecular markers for marker-assisted breeding with  
341 conventional breeding methods in pulse crops; however, genome-wide association mapping  
342 studies with diverse populations at several field locations are essential to avoid the yield and  
343 protein penalty by changing certain carbohydrates as a result of the quantitative nature of these  
344 nutritional traits (Johnson *et al.*, 2020; 2021).

345 Pulses crops, including dry pea, also known as “poor man’s meat,” are low in fat and  
346 provide significant quantities of dietary protein (20-25 g/100 g) and minerals (Ray *et al.*, 2014;  
347 Thavarajah *et al.*, 2015). A 50-g serving of conventional grown dry pea provides 3.7-4.5 mg of Fe,  
348 2.2-2.7 mg of Zn, and 22-34 µg of Se and is very low in PA (2.5-4.4 mg g<sup>-1</sup>), which decreases the  
349 bioavailability of minerals (5,6). Similar to previous studies, our results show organic dry peas are  
350 also rich in Fe, Zn, and Se, but not a good source of Ca (Table 5). Integrating genome-wide  
351 research approaches with conventional plant breeding to identify genetic markers associated with  
352 these mineral traits could significantly accelerate biofortification efforts by enabling molecular  
353 screening of exotic germplasm collections and elite cultivars (Johnson *et al.*, 2021; Powers *et al.*,  
354 2021).

355 A rotational cropping system of dry peas and cereals has been promised in organic and  
356 non-organic farming systems (Olesen *et al.*, 2000; Gan *et al.*, 2015). Dry pea as a winter cash crop  
357 will provide economic and environmental benefits of weed control and soil nutrient management  
358 for smallholder organic farms. Generally, organic producers use legume or grass-legume mix  
359 cover crops for their winter season to increase soil fertility and weed control (Snapp *et al.*, 2005;  
360 Thavarajah *et al.*, 2019;). Overall, critical issues for organic pulse crop production are (1)  
361 production system issues: breeding and selection of high yielding varieties adapted for organic  
362 cropping systems and growing regions; (2) nutritional quality and grading: organic edible pulse

363 markets are susceptible to nutritional quality, so it is difficult to sell anything less than top-grade,  
364 i.e., high protein; (3) marketing and trade: for example, the organic grain market remains small as  
365 a result of a limited number of buyers in a given region; and (4) public research availability:  
366 minimal research is available on organic pulse production, variety development, nutritional  
367 quality, and end-use as a whole food or an ingredient (Trewavas, 2001; Kniss *et al.*, 2016).  
368 Moreover, no research has been conducted regarding reducing the yield gap without compromising  
369 nutritional yield and developing genomic tools for marker-assisted breeding of organic pulse  
370 cultivars, i.e., biofortification of organic pulse grains. Therefore, it is essential within the organic  
371 farming framework to focus on organic plant breeding activities that will result in cultivars that  
372 are more suitable for organic production environments and will deliver economic and social  
373 benefits to growers and consumers. Overall, organic markets (especially the gluten-free market)  
374 will continue to grow >10-20% per annum at the retail sales level for the foreseeable future in all  
375 food categories due to increasing awareness of the connection between diet and human health  
376 (Ohr, 2020). Successful production of organic pulse crops would increase regional production  
377 acreage, grower profitability, and stakeholder confidence in organic farming systems in the USA.

378  
379 **Conclusions:** Organic dry pea is a potential winter crop in southern US regions. Dry pea grain  
380 yields and protein concentrations are within the range of conventional production systems. Further,  
381 organic dry pea is a rich source of prebiotic carbohydrates (14.7-26.6 g/100 g). Most individual  
382 prebiotic carbohydrates are moderate to high in terms of broad-sense heritability estimates, with  
383 the exception of starch polysaccharides. Organic dry peas are rich in minerals with low to moderate  
384 concentrations of phytic acid. “AAC Carver,” “Jetset,” and “Mystique” demonstrated the highest  
385 yields and “CDC Striker” the highest protein concentration. These cultivars can be incorporated  
386 into organic dry pea breeding programs to develop cultivars suitable for organic production.  
387 Finally, organic dry pea production has potential as a winter cash crop in southern climates; this  
388 can be accomplished by selecting diverse genetic material and location sourcing to develop  
389 improved cultivars with a higher yield, disease resistance, and nutritional quality. On-farm  
390 evaluation of dry pea cultivars and advanced breeding lines under organic management provides  
391 valuable information for growers, allowing them to make critical decisions regarding variety  
392 selection for (1) growing location, (2) organic management practice, and (3) intended end-use or

393 nutritional quality (prebiotic carbohydrates, protein, minerals, and low phytate), all of which are  
394 critical for maximizing grower productivity, profitability, and socio-economic status.

395 **Acknowledgments:** Funding support for this project was provided by the Organic Agriculture  
396 Research and Extension Initiative (OREI) (award no. 2018-51300-28431/proposal no. 2018-  
397 02799) of the United States Department of Agriculture, National Institute of Food and Agriculture,  
398 and the USDA-ARS Pulse Health Initiative (DT and RB); the Specialty Crop Block Grant Program  
399 of the U.S. Department of Agriculture through grant AM180100XXXXG026 (DT); the USDA  
400 National Institute of Food and Agriculture, [Hatch] project [1022664] (DT); and the Good Food  
401 Institute (DT). Its contents are solely the responsibility of the authors and do not necessarily  
402 represent the official views of the USDA. We thank Bradley Stancil (Crop Improvement, Clemson  
403 University), David Robb (Organic Farm, Clemson University), Sorghum Breeding and Genetics  
404 (Drs. Boyles and Kresovich team), and Charles Wingard and Ben Dubard from WP Rawl & Sons,  
405 Inc., for field operations; and Martin Hochhalter (Meridian Seeds), Tyler Kres (Pulse USA), the  
406 Washington State Crop Improvement Association, and the USDA-ARS for providing dry pea  
407 seeds.

408

409

410

411

412 Amarakoon D, Thavarajah D, McPhee K, Thavarajah P. Iron-, zinc-, and magnesium-rich field  
413 peas (*Pisum sativum* L.) with naturally low phytic acid: A potential food-based solution to global  
414 micronutrient malnutrition. *J Food Compos Anal.* 2012;27(1).

415 Amarakoon D, Thavarajah D, Sen Gupta D, McPhee K, DeSutter T, Thavarajah P. Genetic and  
416 environmental variation of seed iron and food matrix factors of North-Dakota-grown field peas  
417 (*Pisum sativum* L.). *J Food Compos Anal.* 2015;37.

418 Baird JM, Shirtliffe SJ, Walley FL. Optimal seeding rate for organic production of lentil in the  
419 northern Great Plains. *Can J Plant Sci.* 2009 Nov 1;89(6):1089–97. Available from:  
420 <https://doi.org/10.4141/CJPS08226>.

421 Clark A. Managing cover crops profitably [Internet]. Third Edit. Diane Publishing; 2008. 135–  
422 141 p. Available from:  
423 <https://books.google.com/books?hl=en&lr=&id=ahxLEpn6WYwC&oi=fnd&pg=PP2&dq=11.%09Clark,+A.+2008.+Field+Peas.+Managing+Cover+Crops+Profitably,+Third+Edition.+Sustainable+Agriculture+Research+and+Education+Program,+135-141.+Print&ots=aKuJg-wDTx&sig=QVYFiOgA>.

427 Crowder DW, Reganold JP. Financial competitiveness of organic agriculture on a global scale.  
428 *Proc Natl Acad Sci* [Internet]. 2015 Jun 16 [cited 2020 Jan 7];112(24):7611–6. Available from:  
429 <https://www.pnas.org/content/112/24/7611>.

430 FAO. FAOSTAT [Internet]. FAOSTATS- Crops. 2020 [cited 2020 Dec 9]. Available from:  
431 <http://www.fao.org/faostat/en/#data/QC>.

432 Gan Y, Hamel C, O’Donovan JT, Cutforth H, Zentner RP, Campbell CA, et al. Diversifying crop  
433 rotations with pulses enhances system productivity. *Sci Rep.* 2015;5(1):14625. Available from:  
434 <https://doi.org/10.1038/srep14625>.

435 Godfray HCJ, Beddington JR, Crute IR, Haddad L, Lawrence D, Muir JF, et al. Food Security:  
436 The Challenge of Feeding 9 Billion People. *Science.* 2010 Feb 12;327(5967):812 LP – 818.  
437 Available from: <http://science.sciencemag.org/content/327/5967/812.abstract>.

438 Gollner G, Starz W, Friedel JK. Crop performance, biological N fixation and pre-crop effect of  
439 pea ideotypes in an organic farming system. *Nutr Cycl Agroecosystems.* 2019;115(3):391–405.  
440 Available from: <https://doi.org/10.1007/s10705-019-10021-4>.

441 Institute of Medicine of the National Academies. Dietary Reference Intakes for Energy,  
442 Carbohydrate, Fiber, Fat, Fatty Acids, Cholesterol, Protein, and Amino Acids (Macronutrients).  
443 National Academies Press: Washington, D.C., 2005.  
444

445 Johnson CR, Thavarajah D, Combs GF, Thavarajah P. Lentil (*Lens culinaris* L.): A prebiotic-rich  
446 whole food legume. *Food Res Int.* 2013;51(1).

447 Johnson CR, Thavarajah D, Thavarajah P, Fenlason A, McGee R, Kumar S, et al. A global  
448 survey of low-molecular weight carbohydrates in lentils. *J Food Compos Anal.* 2015;44.

449 Johnson N, Boatwright JL, Bridges W, Thavarajah P, Kumar S, Shipe E, et al. Genome-wide  
450 association mapping of lentil (*Lens culinaris* Medikus) prebiotic carbohydrates toward improved  
451 human health and crop stress tolerance. *Sci Rep.* 2021;11(1):13926. Available from:

452 <https://doi.org/10.1038/s41598-021-93475-3>.

453 Johnson N, Johnson CR, Thavarajah P, Kumar S, Thavarajah D. The roles and potential of lentil  
454 prebiotic carbohydrates in human and plant health. *PLANTS, PEOPLE, PLANET*. 2020 Mar 22.  
455 Available from: <https://doi.org/10.1002/ppp3.10103>.

456 Kniss AR, Savage SD, Jabbour R. Commercial crop yields reveal strengths and weaknesses for  
457 organic agriculture in the United States. *PLoS One*. 2016 Aug 1;11(8).

458 Kniss AR, Savage SD, Jabbour R. Correction: Commercial Crop Yields Reveal Strengths and  
459 Weaknesses for Organic Agriculture in the United States. *PLoS One*. 2016 Nov  
460 8;11(11):e0165851. Available from: <https://doi.org/10.1371/journal.pone.0165851>.

461 Leeson JY, Sheard JW, Thomas AG. Weed communities associated with arable Saskatchewan  
462 farm management systems. *Can J Plant Sci*. 2000 Jan 1;80(1):177–85. Available from:  
463 <https://doi.org/10.4141/P99-039>.

464 Ley RE, Bäckhed F, Turnbaugh P, Lozupone CA, Knight RD, Gordon JI. Obesity alters gut  
465 microbial ecology. *Proc Natl Acad Sci U S A* [Internet]. 2005 Aug 2;102(31):11070 LP – 11075.  
466 Available from: <http://www.pnas.org/content/102/31/11070.abstract>.

467 Linda Milo Ohr. Plant-Based Protein Market Grows Stronger. *Food Technology Magazine*.  
468 2020;74(10). Available from: <https://www.ift.org/news-and-publications/food-technology-magazine/issues/2020/october/columns/nutraceuticals-plant-based-protein-market-grows-stronger>.

471 Muir JG, Rose R, Rosella O, Liels K, Barrett JS, Shepherd SJ, et al. Measurement of Short-  
472 Chain Carbohydrates in Common Australian Vegetables and Fruits by High-Performance Liquid  
473 Chromatography (HPLC). *J Agric Food Chem*. 2009 Jan 28;57(2):554–65. Available from:  
474 <https://doi.org/10.1021/jf802700e>.

475 Murphy K, Garland-Campbell K, Lyon S, Jones S. Evidence of varietal adaptation to organic  
476 farming systems. *F Crop Res*. 2007 Jun 20;102:172–177.

477 Olesen JE, Askegaard M, Rasmussen IA. Design of an Organic Farming Crop-Rotation  
478 Experiment. *Acta Agric Scand Sect B — Soil Plant Sci* [Internet]. 2000 Jan 1;50(1):13–21.  
479 Available from: <https://doi.org/10.1080/090647100750014367>.

480 Peoples MB, Herridge DF, Ladha JK. Biological nitrogen fixation: An efficient source of  
481 nitrogen for sustainable agricultural production? In: Ladha JK, Peoples MB, editors.  
482 *Management of Biological Nitrogen Fixation for the Development of More Productive and*  
483 *Sustainable Agricultural Systems: Extended versions of papers presented at the Symposium on*  
484 *Biological Nitrogen Fixation for Sustainable Agriculture at the 15th Congress* [Internet].  
485 Dordrecht: Springer Netherlands; 1995. p. 3–28. Available from: [https://doi.org/10.1007/978-94-011-0055-7\\_1](https://doi.org/10.1007/978-94-011-0055-7_1).

487 Powers S, Boatwright JL, Thavarajah D. Genome-wide association studies of mineral and phytic  
488 acid concentrations in pea (*Pisum sativum* L.) to evaluate biofortification potential. *G3*  
489 *Genes|Genomes|Genetics*. 2021 Jul 7; Available from:  
490 <https://doi.org/10.1093/g3journal/jkab227>.

491

492 Powers S, Mirsky E, Bandaranayake A, Thavarajah P, Shipe E, Bridges W, et al. Field pea  
493 (*Pisum sativum* L.) shows genetic variation in phosphorus use efficiency in different P  
494 environments. *Sci Rep.* 2020;10(1):18940. Available from: [https://doi.org/10.1038/s41598-020-](https://doi.org/10.1038/s41598-020-75804-0)  
495 [75804-0](https://doi.org/10.1038/s41598-020-75804-0).

496 Powers SE, Thavarajah D. Checking Agriculture's Pulse: Field Pea (*Pisum Sativum* L.),  
497 Sustainability, and Phosphorus Use Efficiency. Vol. 10, *Frontiers in Plant Science* . 2019. p.  
498 1489. Available from: <https://www.frontiersin.org/article/10.3389/fpls.2019.01489>.

499 Ray H, Bett K, Tar'an B, Vandenberg A, Thavarajah D, Warkentin T. Mineral micronutrient  
500 content of cultivars of field pea, chickpea, common bean, and lentil grown in Saskatchewan,  
501 Canada. *Crop Sci.* 2014;54(4).

502 Reganold JP, Wachter JM. Organic agriculture in the twenty-first century. *Nat Plants* [Internet].  
503 2016;2(2):15221. Available from: <https://doi.org/10.1038/nplants.2015.221>.

504 SAS Institute Inc. User's guide: Statistics SAS Institute, Version 9.4. Cary, NC, 2013.

505 Shirtliffe SJ, Johnson EN. Progress towards no-till organic weed control in western Canada.  
506 *Renew Agric Food Syst.* 2012;27(1):60–67.

507 Snapp SS, Swinton SM, Labarta R, Mutch D, Black JR, Leep R, et al. Evaluating Cover Crops  
508 for Benefits, Costs and Performance within Cropping System Niches. *Agron J.* 2005;97:322–32.  
509 Available from: <http://dx.doi.org/10.2134/agronj2005.0322>.

510 Thavarajah D, Abare A, Mapa I, Coyne C, Thavarajah P, Kumar S. Selecting Lentil Accessions  
511 for Global Selenium Biofortification. *Plants.* 2017 Aug 26;6(3):34. Available from:  
512 <http://www.mdpi.com/2223-7747/6/3/34>.

513 Thavarajah D, Siva N, Johnson N, McGee R, Thavarajah P. Effect of cover crops on the yield  
514 and nutrient concentration of organic kale (*Brassica oleracea* L. var. *acephala*). *Sci Rep.*  
515 2019;9(1).

516 Thavarajah, D., Johnson CR, McGee R, Thavarajah P. Phenotyping nutritional and  
517 antinutritional traits. In: *Phenomics in Crop Plants: Trends, Options and Limitations.* 2015.

518 Trewavas A. Urban myths of organic farming. *Nature* [Internet]. 2001;410(6827):409–10.  
519 Available from: <https://doi.org/10.1038/35068639>.

520 USAPulses. Processing Information and Technical Manual [Internet]. Available from:  
521 <https://www.usapulses.org/technical-manual/chapter-3-production/production>.

522 USDA. USDA Organic Agriculture Program [Internet]. 2016. Available from:  
523 <https://nifa.usda.gov/program/organic-agriculture-program>.

524 Vandemark G, Thavarajah S, Siva N, Thavarajah D. Genotype and Environment Effects on  
525 Prebiotic Carbohydrate Concentrations in Kabuli Chickpea Cultivars and Breeding Lines  
526 Grown in the U.S. Pacific Northwest. *Front Plant Sci* [Internet]. 2020;11:112. Available  
527 from: <https://www.frontiersin.org/article/10.3389/fpls.2020.00112>.

528 Wang N, Hatcher DW, Toews R, Gawalko EJ. Influence of cooking and dehulling on nutritional  
529 composition of several varieties of lentils (*Lens culinaris*). *LWT - Food Sci Technol* [Internet].

530 2009;42(4):842–8. Available from:  
531 <https://www.sciencedirect.com/science/article/pii/S0023643808002600>.

532 Wang S, Sharp P, Copeland L. Structural and functional properties of starches from field peas.  
533 Food Chem [Internet]. 2011;126(4):1546–52. Available from:  
534 <https://www.sciencedirect.com/science/article/pii/S0308814610015827>.

535 Wiebe L, Fox SL, Entz MH. Organic selection may improve yield efficiency in spring wheat: a  
536 preliminary analysis. Can J Plant Sci [Internet]. 2016 Oct 28;97(2):298–307. Available from:  
537 <https://doi.org/10.1139/cjps-2016-0141>.

538  
539  
540  
541  
542  
543  
544



545 **Table 1:** Experimental design used in the dry pea nutritional breeding trials.

|                           |                                                                                                                                                                                                                                                                                                                                                                                                                                                                                                                                                                     |
|---------------------------|---------------------------------------------------------------------------------------------------------------------------------------------------------------------------------------------------------------------------------------------------------------------------------------------------------------------------------------------------------------------------------------------------------------------------------------------------------------------------------------------------------------------------------------------------------------------|
| Year (location)           | 2019 (Clemson; Pelion), 2020 (Pelion)                                                                                                                                                                                                                                                                                                                                                                                                                                                                                                                               |
| Location                  | Clemson, SC; Pelion SC                                                                                                                                                                                                                                                                                                                                                                                                                                                                                                                                              |
| Replicates (Year)         | 2 (2019); 3(2020)                                                                                                                                                                                                                                                                                                                                                                                                                                                                                                                                                   |
| Cultivars/ Breeding lines | <b>Cultivars (25):</b> AAC Carver, AAC Comfort, AC Agassiz, AC Earlystar, Banjo, CDC Amarillo, CDC Gwater, CDC Inca, CDC Saffron, CDC Spectrum, CDC Striker, Delta, DS Admiral, Durwood, Fiddle Flute, Hampton, Jetset, Korando, LG Koda, Matrix, Mystique, Nette 2010, SW Arcadia, SW Midas<br><b>Breeding lines (19):</b> PS01100925, PS03101445, PS05100735, PS08100582, PS08101004, PS08101022, PS12100047, PS14100079, PS1410B0003, PS1410B0006, PS1410B0065, PS1410B0073, PS1514B0002, PS16100003, PS16100038, PS16100085, PS16100086, PS16100096, PS16100127 |
| Total                     | 308                                                                                                                                                                                                                                                                                                                                                                                                                                                                                                                                                                 |

546

547 **Table 2:** Mean monthly temperature and precipitation for two growing locations in SC, USA.

| Year | Location | Source             | Jan | Feb  | Mar  | Apr  | May  |
|------|----------|--------------------|-----|------|------|------|------|
| 2019 | Clemson  | Temp (°C)          | 6.1 | 10.0 | 10.8 | 16.9 | 23.1 |
|      |          | Precipitation (mm) | 140 | 193  | 88.9 | 117  | 19.3 |
|      | Pelion   | Temp (°C)          | 9.4 | 12.8 | 13.6 | 19.4 | 25.6 |
|      |          | Precipitation (in) | 3.6 | 1.7  | 2.6  | 4.3  | 2.7  |
| 2020 | Pelion   | Temp (°C)          | 9.6 | 11.0 | 16.6 | 17.6 | 20.8 |
|      |          | Precipitation (in) | 69  | 172  | 83   | 81   | 236  |

548

549 **Table 3:** Soil chemical properties at the locations where dry pea was grown in 2019 and 2020.

550

| Year | Location (Soil type) | Soil pH | N-NO <sub>3</sub> (PPM) | P (lbs/ac) | K (lbs/ac) | Organic Matter (%) |
|------|----------------------|---------|-------------------------|------------|------------|--------------------|
| 2019 | Clemson (Clay loam)  | 6.3     | 48                      | 76         | 284        | 4.3                |
|      | Pelion (Sandy)       | 6.8     | 16                      | 727        | 108        | 0.8                |
| 2020 | Pelion (Sandy)       | 7.1     | 21                      | 549        | 81         | 1.1                |

551 **Table 4:** Analysis of variance and broad-sense heritability estimates of yield and nutritional traits evaluated for dry pea genotypes  
 552 tested in SC, USA.  
 553

| Component                             | Cultivar | Location | Year | Cultivar × Location | Cultivar × Year | $H^2$ |
|---------------------------------------|----------|----------|------|---------------------|-----------------|-------|
| <b>Yield</b>                          | **       | *        | **   | **                  | *               | 0.21  |
| <b>TSW</b>                            | **       | **       | **   | **                  | **              | 0.69  |
| <b>Protein</b>                        | **       | **       | **   | NS                  | **              | 0.24  |
| <b><i>Prebiotic carbohydrates</i></b> |          |          |      |                     |                 |       |
| <i>Sugar Alcohols</i>                 |          |          |      |                     |                 |       |
| Myo-Inositol                          | **       | **       | **   | **                  | **              | 0.52  |
| Xylitol                               | **       | NS       | **   | **                  | **              | 0.66  |
| Galactinol                            | **       | **       | **   | **                  | **              | 0.74  |
| Sorbitol                              | **       | **       | NS   | **                  | NS              | 0.42  |
| Mannitol                              | **       | NS       | **   | NS                  | **              | 0.57  |
| <i>Simple Sugars</i>                  |          |          |      |                     |                 |       |
| Glucose                               | **       | **       | NS   | NS                  | NS              | 0.29  |
| Fructose                              | **       | **       | **   | NS                  | **              | 0.27  |
| Sucrose                               | **       | **       | **   | **                  | NS              | 0.52  |
| Arabinose                             | **       | NS       | **   | **                  | **              | 0.65  |
| Maltose                               | NS       | **       | **   | NS                  | NS              | 0.00  |
| <i>RFO and FOS</i>                    |          |          |      |                     |                 |       |
| Sta+Raf                               | **       | **       | **   | *                   | **              | 0.64  |
| Ver+Kes                               | **       | NS       | **   | **                  | **              | 0.75  |
| Nystose                               | **       | **       | **   | NS                  | *               | 0.27  |
| <i>Starch Polysaccharides</i>         |          |          |      |                     |                 |       |
| Resistant starch                      | NS       | **       | *    | NS                  | **              | 0.00  |
| Total starch                          | NS       | **       | **   | NS                  | NS              | 0.00  |
| <b>Minerals</b>                       |          |          |      |                     |                 |       |
| K                                     | **       | **       | **   | *                   | NS              | 0.07  |
| Ca                                    | *        | **       | **   | NS                  | NS              | 0.03  |
| Mg                                    | *        | **       | NS   | NS                  | NS              | 0.00  |
| P                                     | **       | NS       | NS   | NS                  | NS              | 0.02  |

|             |    |    |    |    |    |      |
|-------------|----|----|----|----|----|------|
| Fe          | ** | ** | ** | ** | NS | 0.00 |
| Zn          | ** | ** | ** | NS | NS | 0.03 |
| Mn          | *  | NS | NS | NS | NS | 0.00 |
| Cu          | ** | NS | NS | NS | NS | 0.00 |
| Se          | NS | ** | ** | NS | NS | 0.00 |
| Phytic acid | *  | NS | ** | NS | NS | 0.00 |

554

555 Raffinose family of oligosaccharides (RFO); Fructooligosaccharides (FOS); Stachyose, and Raffinose (Sta+Raf);

556 Verbascose and Kestose (Ver+Kes); **\*\* significant** at  $P < 0.05$ ; \* significant at  $P < 0.1$ ; Not significant (NS);  $H^2$  broad-sense heritability  
557 estimate.

558

559

560 **Table 5:** Range and mean nutrient concentrations of organic dry pea grown in SC.

| Nutrient                         | Organic   |      | %RDA      |           |
|----------------------------------|-----------|------|-----------|-----------|
|                                  | Range     | Mean | Female    | Male      |
| <b>Protein (g/100 g)</b>         | 12.6-34.2 | 21.1 | 27-74(46) | 23-61(38) |
| <b>Prebiotic carbohydrates</b>   |           |      |           |           |
| <i>Sugar Alcohols (mg/100 g)</i> |           |      |           |           |
| Myo-Inositol                     | 98-399    | 244  |           |           |
| Xylitol                          | 2.5-31.7  | 15.7 |           |           |
| Galactinol                       | 91.3-425  | 163  |           |           |
| Sorbitol                         | 8.4-115   | 34.9 |           |           |
| Mannitol                         | 0.9-23.8  | 5.9  |           |           |
| <i>Simple Sugars (mg/100 g)</i>  |           |      |           |           |
| Glucose                          | 14.6-137  | 62   |           |           |
| Fructose                         | 1.7-30.7  | 6.4  |           |           |
| Sucrose                          | 1530-3043 | 2156 |           |           |
| Arabinose                        | 3.3-13.1  | 7.2  |           |           |
| Maltose                          | 2.1-289   | 26.3 |           |           |
| <i>RFO and FOS (mg/100 g)</i>    |           |      |           |           |
| Sta+Raf                          | 2111-4077 | 3128 |           |           |
| Ver+Kes                          | 1548-3929 | 2688 |           |           |

|                                               |           |      |            |            |
|-----------------------------------------------|-----------|------|------------|------------|
| Nystose                                       | 1.6-9.1   | 3.4  |            |            |
| <i>Starch Polysaccharides (g/100 g)</i>       |           |      |            |            |
| Resistant starch                              | 4.2-10    | 7.6  |            |            |
| Total starch                                  | 35.4-66.9 | 52.6 |            |            |
| Total known prebiotic carbohydrates (g/100 g) | 12.5-19.8 | 16.1 | 63-99 (81) | 63-99 (81) |
| <b><i>Minerals (mg/100 g)</i></b>             |           |      |            |            |
| Potassium (K)                                 | 322-1716  | 1008 | 38.8       | 29.6       |
| Calcium (Ca)                                  | 11-338    | 94   | 7.8-9.4    | 9.4        |
| Magnesium (Mg)                                | 46-232    | 125  | 39.1- 40.3 | 31.3       |
| Phosphorus (P)                                | 123-759   | 377  | 53.9       | 53.9       |
| Iron (Fe)                                     | 1.9-26.2  | 5.7  | 31.7-71.3  | 71.3       |
| Zinc (Zn)                                     | 1.1-7.5   | 3.2  | 40.0       | 29.1       |
| Manganese (Mn)                                | 0.4-3.4   | 1.2  | 66.7       | 52.2       |
| Copper (Cu)                                   | 0.2-3.5   | 0.8  | 88.9       | 88.9       |
| Selenium (Se: µg/100 g)                       | 0-130     | 20   | 36.4       | 36.4       |
| Phytic acid (mg/100 g)                        | 88.8-354  | 159  |            |            |

561

562 Values are based on the combined statistical analysis of 308 data points for the current study (dry weight basis). Total prebiotic  
563 carbohydrates include sugar alcohols, simple sugars, raffinose-family oligosaccharides, and resistant starch. % RDA is based on 20  
564 g/day for total prebiotic carbohydrates (22). %RDA for protein is 46 g/day for women aged 19-70+ years and 56 g/day for men aged  
565 19-70+years. Mineral %RDA values are from the National Institute of Health

566 ([https://www.ncbi.nlm.nih.gov/books/NBK545442/table/appJ\\_tab3/?report=objectonly](https://www.ncbi.nlm.nih.gov/books/NBK545442/table/appJ_tab3/?report=objectonly))

567

568

569

570

571

572

573

574

575 **Table 6:** Correlation of yield, prebiotic carbohydrates, and protein content of organic dry pea genotypes.

| Variable              | Yield | Myo  | Xyl  | Gal  | Sor | Man  | Glu  | Fru  | Suc  | Ara  | Mal  | Sta+Raf | Ver+Kes | Nys  | RS   | SS  | TS | Pro |  |
|-----------------------|-------|------|------|------|-----|------|------|------|------|------|------|---------|---------|------|------|-----|----|-----|--|
| Yield                 | -     |      |      |      |     |      |      |      |      |      |      |         |         |      |      |     |    |     |  |
| Myo-Inositol (Myo)    | NS    | -    |      |      |     |      |      |      |      |      |      |         |         |      |      |     |    |     |  |
| Xylitol (Xyl)         | -.**  | NS   | -    |      |     |      |      |      |      |      |      |         |         |      |      |     |    |     |  |
| Galactinol (Gal)      | **    | **   | -.** | -    |     |      |      |      |      |      |      |         |         |      |      |     |    |     |  |
| Sorbitol (Sor)        | **    | **   | -.** | **   | -   |      |      |      |      |      |      |         |         |      |      |     |    |     |  |
| Mannitol (Man)        | -.**  | **   | **   | -.** | NS  | -    |      |      |      |      |      |         |         |      |      |     |    |     |  |
| Glucose (Glu)         | **    | **   | NS   | **   | **  | NS   | -    |      |      |      |      |         |         |      |      |     |    |     |  |
| Fructose (Fru)        | *     | NS   | NS   | NS   | **  | **   | **   | -    |      |      |      |         |         |      |      |     |    |     |  |
| Sucrose (Suc)         | -.**  | **   | **   | NS   | NS  | NS   | **   | **   | -    |      |      |         |         |      |      |     |    |     |  |
| Arabinose (Ara)       | -.**  | NS   | **   | -.** | NS  | **   | NS   | **   | **   | -    |      |         |         |      |      |     |    |     |  |
| Maltose (Mal)         | -.**  | **   | *    | **   | **  | *    | **   | **   | **   | **   | -    |         |         |      |      |     |    |     |  |
| Sta+Raf               | **    | **   | NS   | **   | **  | -.** | **   | **   | **   | -.** | **   | -       |         |      |      |     |    |     |  |
| Ver+Kes               | **    | -.** | -.** | NS   | **  | NS   | NS   | **   | **   | -.** | -.** | **      | -       |      |      |     |    |     |  |
| Nystose (Nys)         | **    | -.** | -.** | **   | NS  | -.** | **   | **   | -.** | NS   | NS   | **      | **      | -    |      |     |    |     |  |
| Resistant starch (RS) | -.**  | -.** | **   | **   | **  | **   | -.** | -.** | **   | NS   | **   | **      | -.**    | **   | -    |     |    |     |  |
| Soluble starch (SS)   | **    | -.** | NS   | **   | **  | **   | **   | **   | NS   | NS   | NS   | -.**    | **      | -.** | -.** | -   |    |     |  |
| Total starch (TS)     | **    | **   | **   | -.** | **  | NS   | **   | NS   | NS   | NS   | NS   | **      | NS      | NS   | NS   | **  | -  |     |  |
| Protein (Pro)         | -.**  | *    | *    | NS   | NS  | **   | NS   | NS   | *    | **   | **   | NS      | -.**    | -.** | NS   | -.* | NS | -   |  |

576 Stachyose and Raffinose (Sta+Raf); Verbascose and Kestose (Ver+Kes); \*\* significant at  $P < 0.05$ ; \* significant at  $P < 0.1$ ; Not  
577 significant (NS).

578

579

580

581

582

583 **Table 7:** Correlation of yield, critical minerals, and phytic acid concentrations of organic dry pea genotypes.

| Variable    | Yield | K  | Mg | Fe | Zn  | P  | phytic acid |
|-------------|-------|----|----|----|-----|----|-------------|
| Yield       | -     |    |    |    |     |    |             |
| K           | -*    | -  |    |    |     |    |             |
| Mg          | **    | ** | -  |    |     |    |             |
| Fe          | *     | ** | ** | -  |     |    |             |
| Zn          | NS    | ** | ** | ** | -   |    |             |
| P           | NS    | ** | ** | ** | **  | -  |             |
| Phytic acid | NS    | -* | -* | -* | -** | -* | -           |

584

585

586

587

588

589

590

591

592

593

594

595

596

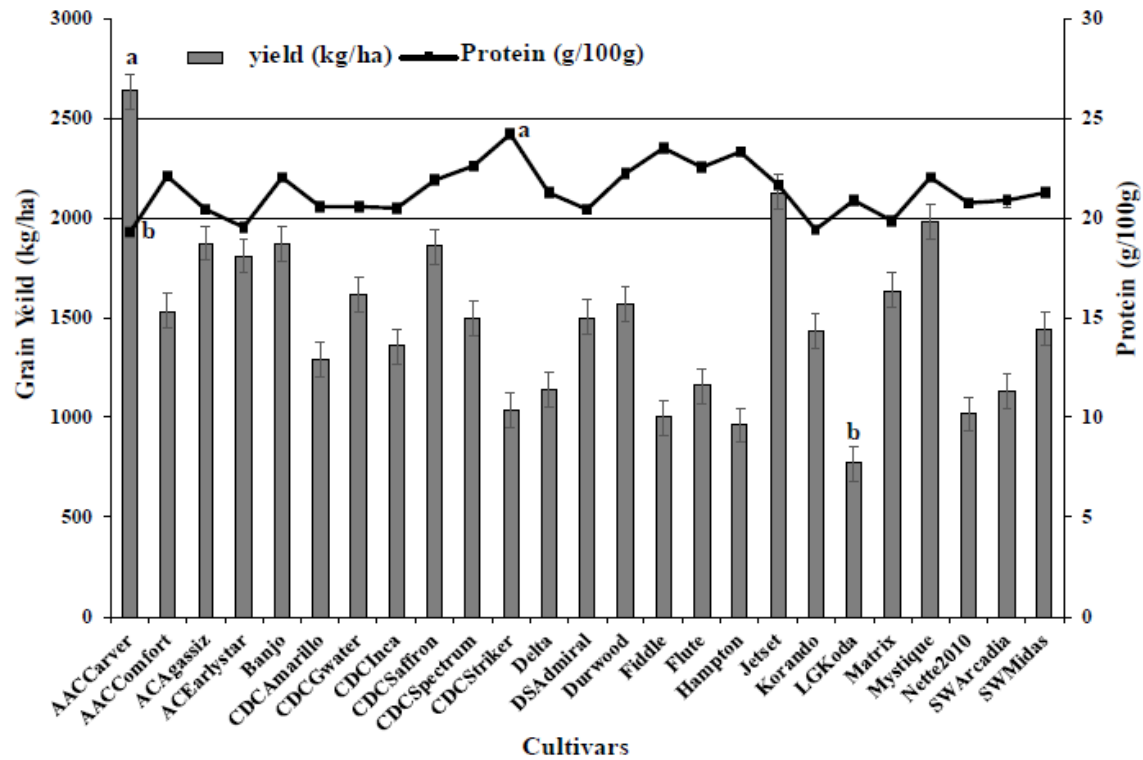

597 **Figure 1:** Variation of grain yield and protein content among dry pea cultivars grown in the organic system.  
 598

599

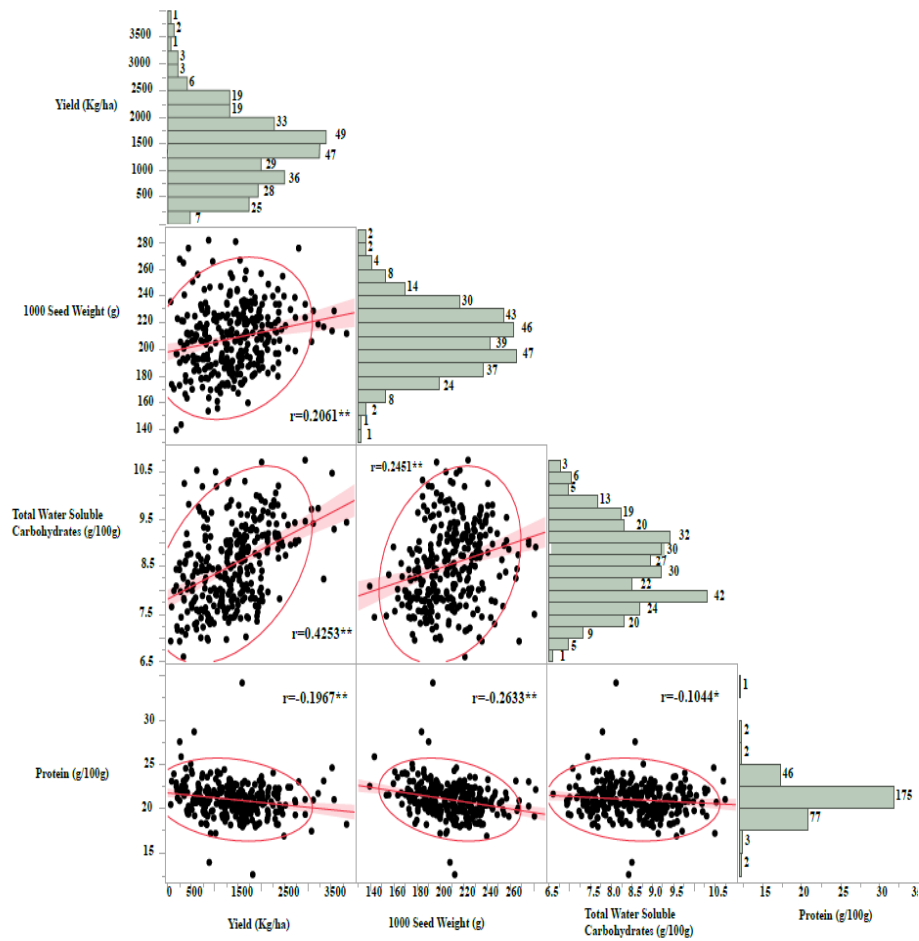

617 **Figure 2:** Correlations and distribution of grain yield, 1000 seed weight, total water-soluble carbohydrates, and protein concentration  
 618 among the genotypes grown under organic field conditions.



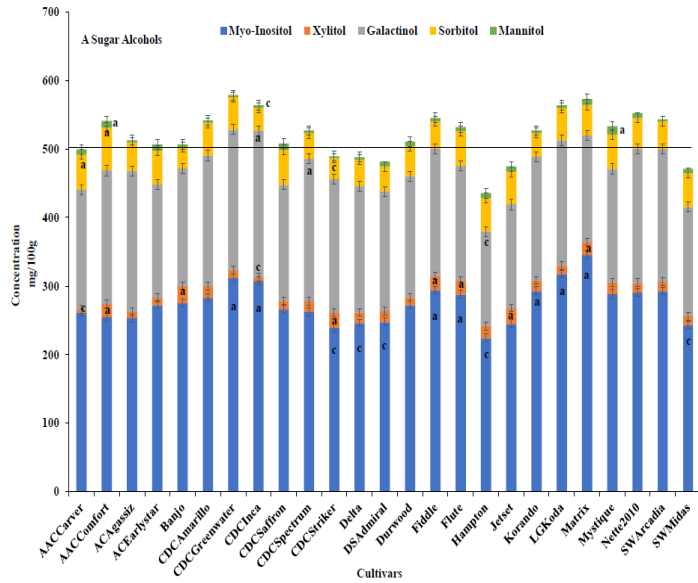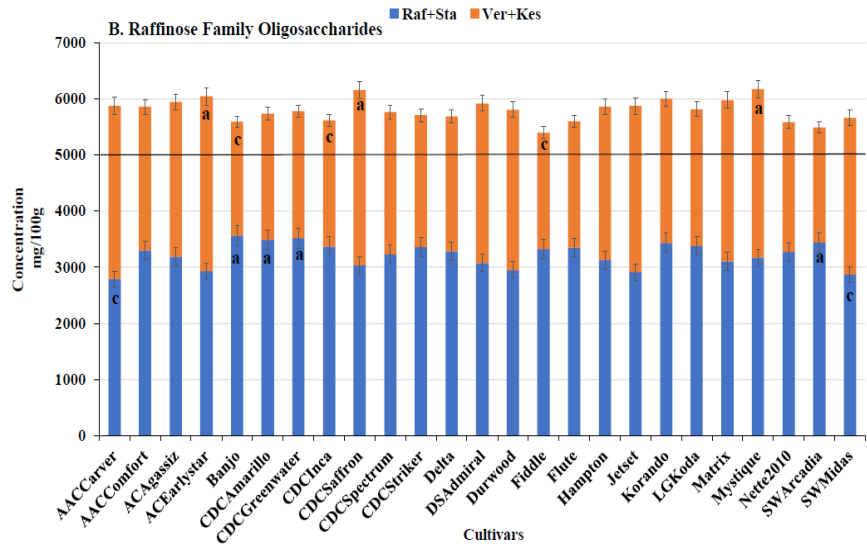

619

620

621 **Figure 3:** Variation of (A) sugar alcohols and (B) raffinose family oligosaccharides concentrations among dry pea cultivars grown in  
 622 an organic system.

623



Click here to access/download  
**Supporting Information**  
Suplimentary- data.xlsx



Supplement: pone.0261109.s002.pdf [file pone.0261109.s002.pdf]
